# Supplementary material for: Generating water/MeOH-soluble and luminescent polymers by grafting 2,6-bis(1,2,3-triazol-4-yl)pyridine (btp) ligands onto a poly(ethylene-alt-maleic anhydride) polymer and cross-linking with terbium(iii)
Source: Royal Society of Chemistry journal article supplement (doi:10.1039/d2ob02259a), 2023-01-01
Supplement: d2ob02259a1.pdf [file d2ob02259a1.pdf]

## Generating Water/MeOH-soluble and luminescent polymers by grafting 2,6-bis(1,2,3-triazol-4-yl)pyridine (btp) ligands onto a poly(ethylene-alt-maleic anhydride) polymer and cross-linking with terbium(III)

Isabel N. Hegarty,<sup>a</sup> Adam F. Henwood,<sup>a,b</sup> Samuel J. Bradberry<sup>a\*</sup> and Thorfinnur Gunnlaugsson<sup>a,b\*</sup>

### ESI

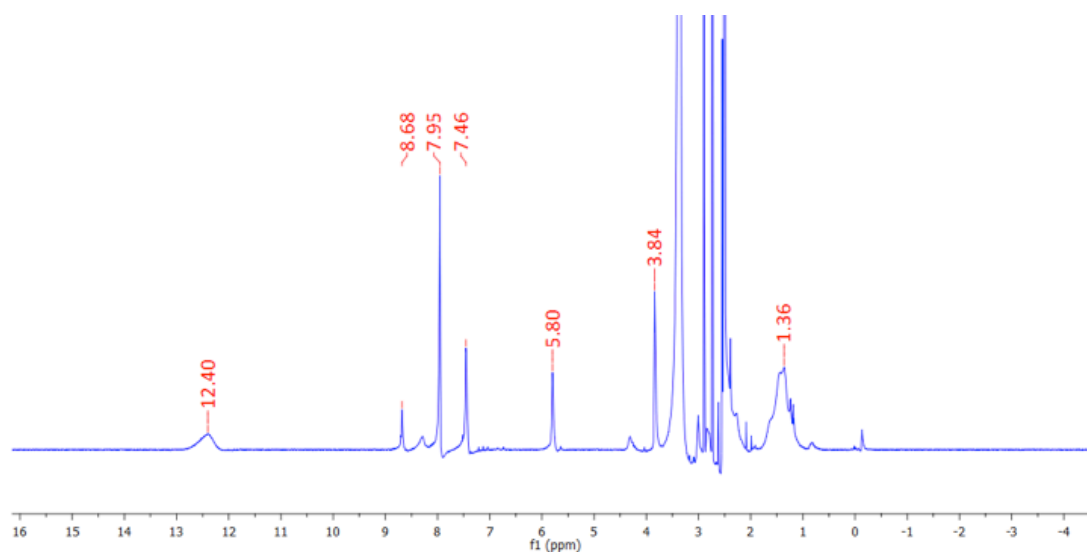

**Figure S1.** <sup>1</sup>H NMR spectrum (600 MHz, DMSO) of **P2**.

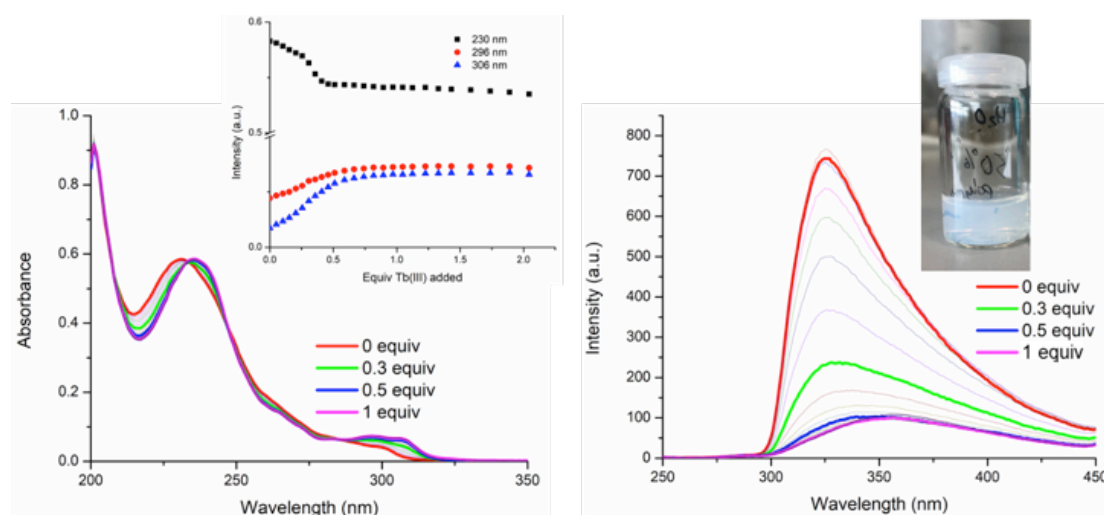

**Figure S2.** The overall changes in the (left) UV-vis absorption spectra and (right) fluorescence emission spectra ( $\lambda_{\text{exc}} = 237$  nm) upon titrating **P2** ( $1 \times 10^{-5}$  M) against  $\text{Tb}(\text{CF}_3\text{SO}_3)_3$  (0  $\rightarrow$  3 equiv.) in  $\text{CH}_3\text{OH}$  at RT. **Inset:** corresponding experimental binding isotherms of absorbance at  $\lambda = 230$ , 295 and 306 nm and photograph of **P2** dissolved in  $\text{H}_2\text{O}$ .

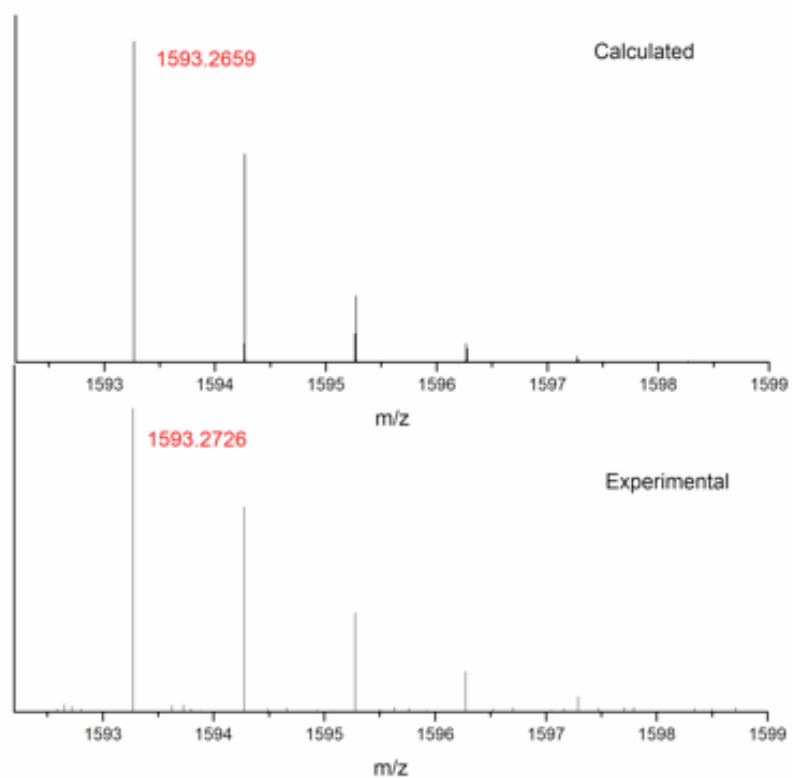

**Figure S3.** The calculated and experimental isotopic distribution patterns for Tb.1<sub>2</sub> showing the 1:2 metal:ligand stoichiometric pattern for a molecular species of the formula  $[Tb(1)_2](CF_3SO_3)_2^+$ .
